# Supplementary material
Source: publisher figshare collection journal article supplement (https://sage.figshare.com/ndownloader/files/12370964)
Supplement: Supplementary file 1 [file 12370964]

Inclusion of Other in Self Scale

1) Which picture best describes your relationship with your partner? \_\_\_\_\_

2)

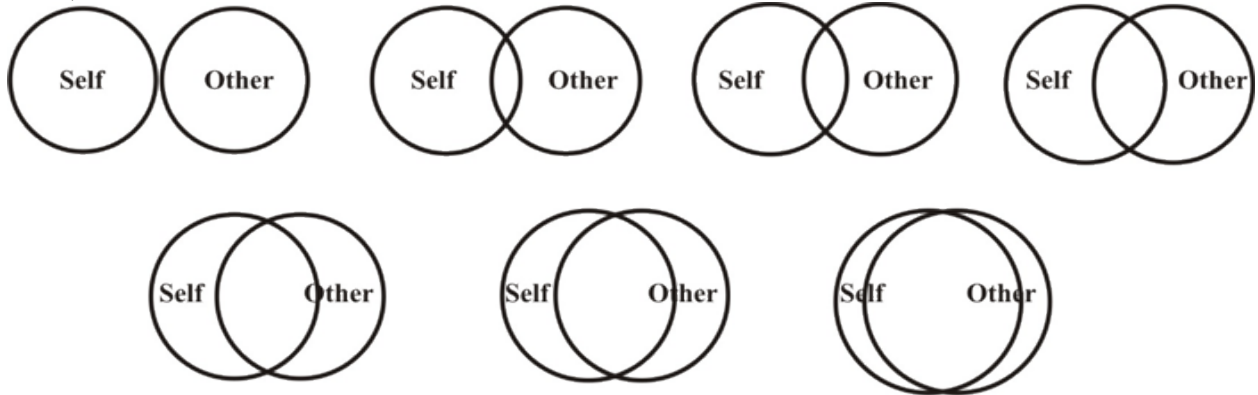

3) In your ideal relationship, which picture best describes how you would like your relationship to be with your partner? \_\_\_\_\_

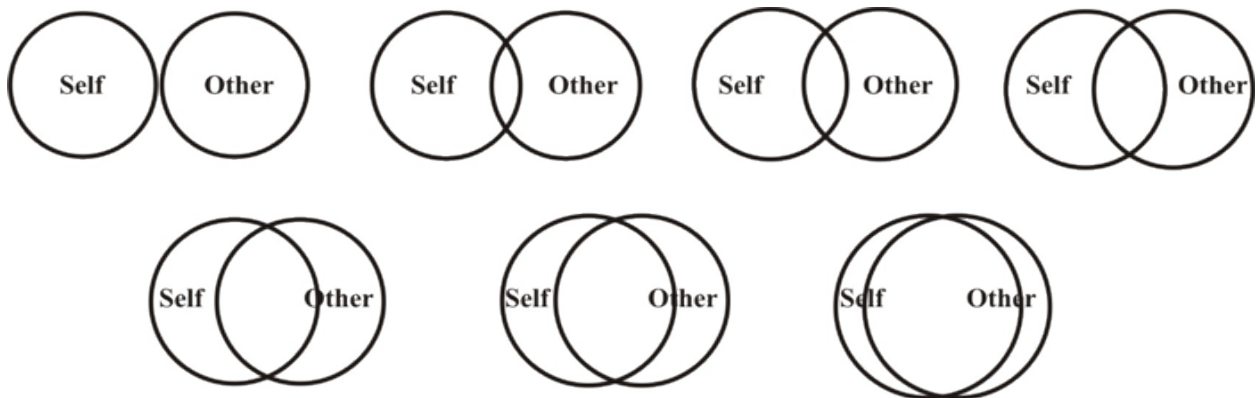

Intimacy Interference Barriers Subscale:

- 1) Not using a condom shows a partner how much I care about him
- 2) A guy cumming inside of you is an expression of love
- 3) Not using a condom with a partner shows him that I trust him
- 4) Having sex without a condom shows a partner that I want to see him again

### Study 1 PrEP Adoption Intentions:

How likely would you be to take PrEP, if it were available for free?

- a. I would definitely take it
- b. I would probably take it
- c. I might take it
- d. I would probably not take it
- e. I would definitely not take it

### Risk Perception

How likely do you think you are to get HIV in your lifetime?

Please enter a number from 0 to 100, where 0 means not at all and 100 means you feel you will definitely get HIV in your lifetime.

### Relationship Satisfaction

Citation: Agnew, C.R., Van Lange, P.A.M., Rusbult, C.E., & Langston, C.A. (1998). Cognitive interdependence: Commitment and mental representations of close relationships. *Journal of Personality and Social Psychology*, 74(4), 939-954.

Commitment Level subscale

- 1) For how much longer do you want your relationship to last?
- 2) Do you feel committed to maintaining your relationship with your partner?
- 3) Do you feel attached to your relationship with your partner (like you're "linked" to your partner, whether or not you're happy with the relationship)?

Response Options: 0=not at all committed; 8= completely committed

Satisfaction level subscale

- 4) All things considered, to what degree do you feel satisfied with your relationship?
- 5) Taking into account all of the qualities that are most important to you, how does your relationship compare to other people's?
- 6) All things considered, how does your relationship compare to your ideal?

Response Options: 0=Not at all satisfied; 8=completely satisfied

### Sexual Satisfaction Scale

Snell Jr, W. E., Fisher, T.D., & Walters, A.S. (1993). The Multidimensional Sexuality Questionnaire: An objective self-report measure of psychological tendencies associated with human sexuality. *Annals of Sex Research*, 6(1), 27-55.

**INSTRUCTIONS:** The items in this questionnaire refer to people's sexuality. Please read each item carefully and decide to what extent it is characteristic of you. Give each item a rating of how much it applies to you by using the following scale:

1. I am satisfied with the way my sexual needs are currently being met. (S)
2. I am satisfied with the status of my own sexual fulfillment. (S)
3. The sexual aspects of my life are personally gratifying to me. (S)
4. The sexual aspects of my life are satisfactory, compared to most people's. (S)
5. I am satisfied with the sexual aspects of my life. (S)

0= Not at all characteristic of me

1= Slightly characteristic of me

2= Somewhat characteristic of me

3= Moderately characteristic of me

4= Very characteristic of me
